# Supplementary material for: A label-free near-infrared fluorescent assay for the determination of deoxyribonuclease I activity based on malachite green/G-quadruplexes
Source: Royal Society of Chemistry journal article supplement (doi:10.1039/c3an00213f), 2013-01-01
Supplement: c3an00213f.pdf [file c3an00213f.pdf]

## *Electronic Supplementary Information*

### **A Label-Free Near-Infrared Fluorescent Assay for the Determination of Deoxyribonuclease I Activity Based on Malachite Green /G-quadruplexes**

**Shao-Kai Sun, Bei-Bei Wang and Xiu-Ping Yan\***

State Key Laboratory of Medicinal Chemical Biology, and Research Center for Analytical Sciences, College of Chemistry, Nankai University, 94 Weijin Road, Tianjin 300071, China

**Table S1. Comparison of the proposed DNase I activity assay with other methods for determining DNase I activity with respect to the synthesis of probe, detection limit and linear dynamic range.**

| Methods                        | Synthesis | Detection limit         | Linear dynamic range                         | Reference |
|--------------------------------|-----------|-------------------------|----------------------------------------------|-----------|
| NIR Fluorescence               | No        | 1 u/mL                  | 5-100 u/mL                                   | This work |
| Electrochemical assay          | Yes       | 0.1 u/mL                | 0.1-1 u/mL                                   | (1)       |
| Electrochemical assay          | Yes       | 0.01 u/mL               | 0.01-1 u/mL                                  | (2)       |
| Colorimetric methods           | Yes       | 0.01 u/mL               | Not available                                | (3)       |
| Fluorescence probes            | Yes       | 0.02 u/mL               | 0.03-9 u/mL                                  | (4)       |
| ELISA                          | Yes       | 0.004 u/mL              | 0.004-0.138 u/mL                             | (5)       |
| Immunochemical assay           | Yes       | 0.005 u/mL              | 0.005-0.1 u/mL                               | (6)       |
| Fluorescence probe (PicoGreen) | No        | $8 \times 10^{-5}$ u/mL | $8 \times 10^{-5}$ - $8 \times 10^{-4}$ u/mL | (7)       |
| SRED/CAM                       | Yes       | $5 \times 10^{-6}$ u/mL | $5 \times 10^{-6}$ -0.2 u/mL                 | (8)       |

## References

- (1) Sato, S.; Fujita, K.; Kanazawa, M.; Mukumoto, K.; Ohtsuka, K.; Waki, M.; Takenaka, S. *Anal. Biochem.* **2008**, *381*, 233-239.
- (2) Sato, S.; Fujita, K.; Kanazawa, M.; Mukumoto, K.; Ohtsuka, K.; Takenaka, S. *Anal. Chim. Acta* **2009**, *645*, 30-35.
- (3) Zhao, W. A.; Ali, M. M.; Aguirre, S. D.; Brook, M. A.; Li, Y. F. *Anal. Chem.* **2008**, *80*, 8431-8437.
- (4) Gong, P.; Shi, B. H.; Zhang, P. F.; Hu, D. H.; Zheng, M. B.; Zheng, C. F.; Gao, D. Y.; Cai, L. *T. Nanoscale* **2012**, *4*, 2454-2462.
- (5) Nakajima, T.; Takagi, R.; Tajima, Y.; Makita, C.; Kominato, Y.; Kuribara, J.; Ohshima, S.; Tada, H.; Tsurugaya, H.; Kobayashi, Y.; Takeshita, H.; Kawai, Y.; Yasuda, T. *Clin. Chim. Acta*

**2009**, *403*, 219-222.

- (6) Cherepanova, A.; Tamkovich, S.; Pyshnyi, D.; Kharkova, M.; Vlassov, V.; Laktionov, P. *J.*

*Immunol. Methods.* **2007**, *325*, 96-103.

- (7) Choi, S. J.; Szoka, F. C., *Anal. Biochem.* **2000**, *281* (1), 95-97.

- (8) Takeshita, H.; Nakajima, T.; Mogi, K.; Kaneko, Y.; Yasuda, T.; Iida, R.; Kishi, K. *Clin. Chem.*

**2004**, *50*, 446-448.
